# Supplementary material
Source: PubMed Central journal article supplement (PMC2766596)
Supplement: NIHMS146809-supplement-Supp_Data_5.pdf [file NIHMS146809-supplement-Supp_Data_5.pdf]

***MATRIX*** Mascot Search Results  
***SCIENCE***

## Peptide View

MS/MS Fragmentation of **LIFAGKQLEDGR**  
Found in **UBIQ\_BOVIN**, (P62990) Ubiquitin

Match to Query 562: 1459.721490 from(487.581106,3+)  
Title: File: QSMPB060524001.wiff, Sample: MPB00001A (sample number 1), Elution: 36.341 min, Period: 1, Cycle(s): 985 (Experiment 2)  
Data file G:\Donn•es Q-Star\Marie-Pierre Bousquet\LCMSMS060524 et 29 P26S UCLA Lot1 temoin\QSMPB060524001.wiff

Click mouse within plot area to zoom in by factor of two about that point

Or,                                    to                                    Da

**Monoisotopic mass of neutral peptide Mr(calc): 1459.7783**

**Variable modifications:**

**K6         :** Ubiquitinylated (K)

**Ions Score:** 53    **Expect:** 0.0077

**Matches (Bold Red):** 14/102 fragment ions using 31 most intense peaks

| #  | b         | b++      | b*        | b***     | b <sup>0</sup> | b <sup>0++</sup> | Seq. | y         | y++      | y*        | y***     | y <sup>0</sup> | y <sup>0++</sup> | #  |
|----|-----------|----------|-----------|----------|----------------|------------------|------|-----------|----------|-----------|----------|----------------|------------------|----|
| 1  | 114.0913  | 57.5493  |           |          |                |                  | L    |           |          |           |          |                |                  | 12 |
| 2  | 227.1754  | 114.0913 |           |          |                |                  | I    | 1347.7015 | 674.3544 | 1330.6750 | 665.8411 | 1329.6910      | 665.3491         | 11 |
| 3  | 374.2438  | 187.6255 |           |          |                |                  | F    | 1234.6175 | 617.8124 | 1217.5909 | 609.2991 | 1216.6069      | 608.8071         | 10 |
| 4  | 445.2809  | 223.1441 |           |          |                |                  | A    | 1087.5491 | 544.2782 | 1070.5225 | 535.7649 | 1069.5385      | 535.2729         | 9  |
| 5  | 502.3024  | 251.6548 |           |          |                |                  | G    | 1016.5120 | 508.7596 | 999.4854  | 500.2463 | 998.5014       | 499.7543         | 8  |
| 6  | 744.4403  | 372.7238 | 727.4138  | 364.2105 |                |                  | K    | 959.4905  | 480.2489 | 942.4640  | 471.7356 | 941.4799       | 471.2436         | 7  |
| 7  | 872.4989  | 436.7531 | 855.4723  | 428.2398 |                |                  | Q    | 717.3526  | 359.1799 | 700.3260  | 350.6667 | 699.3420       | 350.1746         | 6  |
| 8  | 985.5829  | 493.2951 | 968.5564  | 484.7818 |                |                  | L    | 589.2940  | 295.1506 | 572.2675  | 286.6374 | 571.2834       | 286.1454         | 5  |
| 9  | 1114.6255 | 557.8164 | 1097.5990 | 549.3031 | 1096.6150      | 548.8111         | E    | 476.2099  | 238.6086 | 459.1834  | 230.0953 | 458.1994       | 229.6033         | 4  |
| 10 | 1229.6525 | 615.3299 | 1212.6259 | 606.8166 | 1211.6419      | 606.3246         | D    | 347.1673  | 174.0873 | 330.1408  | 165.5740 | 329.1568       | 165.0820         | 3  |
| 11 | 1286.6739 | 643.8406 | 1269.6474 | 635.3273 | 1268.6634      | 634.8353         | G    | 232.1404  | 116.5738 | 215.1139  | 108.0606 |                |                  | 2  |
| 12 |           |          |           |          |                |                  | R    | 175.1189  | 88.0631  | 158.0924  | 79.5498  |                |                  | 1  |

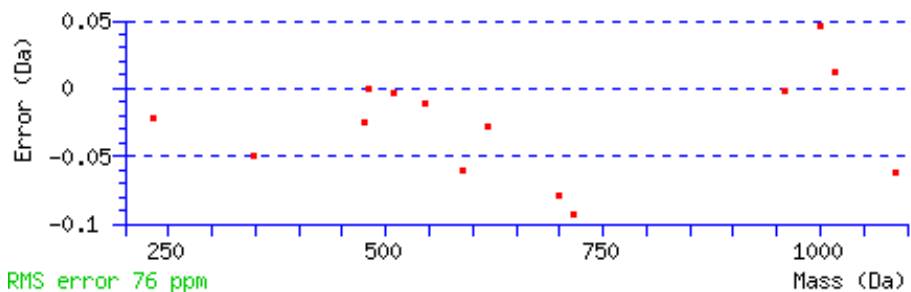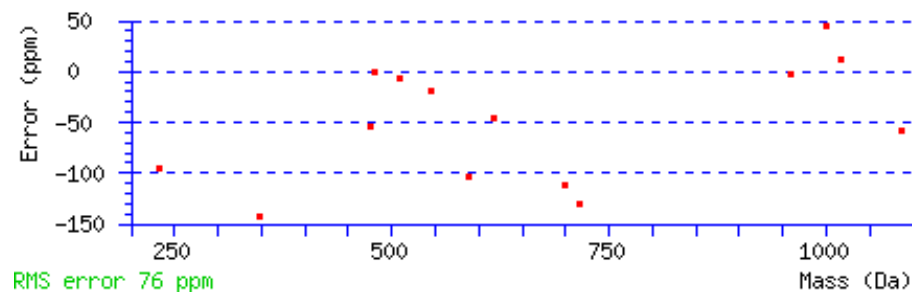

NCBI BLAST search of [LIFAGKQLEDGR](#)

(Parameters: blastp, nr protein database, expect=20000, no filter, PAM30)

Other BLAST [web gateways](#)

### All matches to this query

| Score | Mr(calc): | Delta   | Sequence                        |
|-------|-----------|---------|---------------------------------|
| 53.1  | 1459.7783 | -0.0568 | <a href="#">LIFAGKQLEDGR</a>    |
| 14.9  | 1459.7154 | 0.0061  | <a href="#">EGVSEAEELGGTGLK</a> |
| 14.8  | 1459.7783 | -0.0568 | <a href="#">LDAAAFQKGLQ GK</a>  |

|      |           |         |                                 |
|------|-----------|---------|---------------------------------|
| 12.2 | 1459.8293 | -0.1078 | <a href="#">VATCLQKRVSISR</a>   |
| 11.9 | 1459.6725 | 0.0490  | <a href="#">EAAALQCQLEDGR</a>   |
| 11.6 | 1459.7783 | -0.0568 | <a href="#">LDAAAFQKGLQK</a>    |
| 10.3 | 1459.7704 | -0.0490 | <a href="#">EMKLLEQSGALK</a>    |
| 9.7  | 1459.7639 | -0.0424 | <a href="#">VVCKQLGCGQAVK</a>   |
| 8.6  | 1459.7313 | -0.0098 | <a href="#">QRGSASPMAGSGAKR</a> |
| 7.9  | 1459.7341 | -0.0126 | <a href="#">MSPKKVGDDIAK</a>    |

**Mascot:** <http://www.matrixscience.com/>



| #  | b         | b <sup>++</sup> | b <sup>*</sup>  | b <sup>+++</sup> | b <sup>0</sup> | b <sup>0++</sup> | Seq. | y                | y <sup>++</sup> | y <sup>*</sup> | y <sup>+++</sup> | y <sup>0</sup>  | y <sup>0++</sup> | #  |
|----|-----------|-----------------|-----------------|------------------|----------------|------------------|------|------------------|-----------------|----------------|------------------|-----------------|------------------|----|
| 1  | 114.0913  | 57.5493         |                 |                  |                |                  | L    |                  |                 |                |                  |                 |                  | 12 |
| 2  | 227.1754  | 114.0913        |                 |                  |                |                  | I    | 1347.7015        | 674.3544        | 1330.6750      | 665.8411         | 1329.6910       | 665.3491         | 11 |
| 3  | 374.2438  | 187.6255        |                 |                  |                |                  | F    | 1234.6175        | <b>617.8124</b> | 1217.5909      | 609.2991         | 1216.6069       | 608.8071         | 10 |
| 4  | 445.2809  | 223.1441        |                 |                  |                |                  | A    | <b>1087.5491</b> | <b>544.2782</b> | 1070.5225      | 535.7649         | 1069.5385       | 535.2729         | 9  |
| 5  | 502.3024  | 251.6548        |                 |                  |                |                  | G    | <b>1016.5120</b> | <b>508.7596</b> | 999.4854       | 500.2463         | 998.5014        | 499.7543         | 8  |
| 6  | 744.4403  | 372.7238        | <b>727.4138</b> | 364.2105         |                |                  | K    | <b>959.4905</b>  | 480.2489        | 942.4640       | 471.7356         | 941.4799        | 471.2436         | 7  |
| 7  | 872.4989  | 436.7531        | 855.4723        | 428.2398         |                |                  | Q    | <b>717.3526</b>  | 359.1799        | 700.3260       | 350.6667         | <b>699.3420</b> | 350.1746         | 6  |
| 8  | 985.5829  | 493.2951        | 968.5564        | 484.7818         |                |                  | L    | <b>589.2940</b>  | 295.1506        | 572.2675       | 286.6374         | 571.2834        | 286.1454         | 5  |
| 9  | 1114.6255 | 557.8164        | 1097.5990       | 549.3031         | 1096.6150      | 548.8111         | E    | <b>476.2099</b>  | 238.6086        | 459.1834       | 230.0953         | 458.1994        | 229.6033         | 4  |
| 10 | 1229.6525 | 615.3299        | 1212.6259       | 606.8166         | 1211.6419      | 606.3246         | D    | <b>347.1673</b>  | 174.0873        | 330.1408       | 165.5740         | 329.1568        | 165.0820         | 3  |
| 11 | 1286.6739 | 643.8406        | 1269.6474       | 635.3273         | 1268.6634      | 634.8353         | G    | <b>232.1404</b>  | 116.5738        | 215.1139       | 108.0606         |                 |                  | 2  |
| 12 |           |                 |                 |                  |                |                  | R    | 175.1189         | 88.0631         | 158.0924       | 79.5498          |                 |                  | 1  |

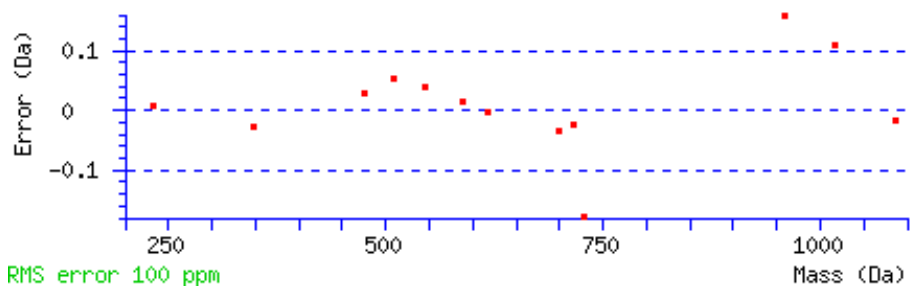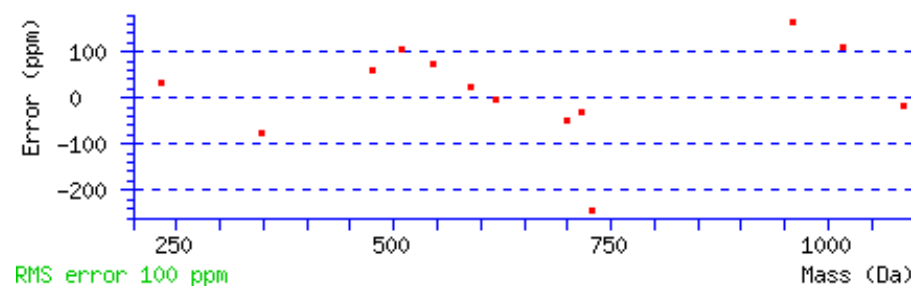

NCBI **BLAST** search of [LIFAGKQLEDGR](#)

(Parameters: blastp, nr protein database, expect=20000, no filter, PAM30)

Other BLAST [web gateways](#)

**All matches to this query**

| Score | Mr(calc): | Delta  | Sequence                       |
|-------|-----------|--------|--------------------------------|
| 50.2  | 1459.7783 | 0.0172 | <a href="#">LIFAGKQLEDGR</a>   |
| 12.1  | 1459.6763 | 0.1192 | <a href="#">SKDGNNGGGGGGGK</a> |
| 11.6  | 1459.6725 | 0.1231 | <a href="#">EAAALQCQLEDGR</a>  |
| 11.0  | 1459.7783 | 0.0172 | <a href="#">LDAAAFQKGLQGK</a>  |

|     |           |         |                                |
|-----|-----------|---------|--------------------------------|
| 9.3 | 1459.8035 | -0.0079 | <a href="#">KIADFGLATQLK</a>   |
| 9.1 | 1459.6763 | 0.1192  | <a href="#">SKDGNGGGGGGGGK</a> |
| 8.1 | 1459.7341 | 0.0615  | <a href="#">EEQGCVIEKLK</a>    |
| 8.1 | 1459.7341 | 0.0615  | <a href="#">MSPKKVGDDIAK</a>   |
| 7.2 | 1459.6850 | 0.1105  | <a href="#">NGGAPCVGERHHAR</a> |
| 7.1 | 1459.7341 | 0.0615  | <a href="#">IGTVTSGCPSPSLK</a> |

**Mascot:** <http://www.matrixscience.com/>
